# Supplementary material
Source: Springer Nature journal article supplement (https://www.springermedizin.de/resource/supplementary/12913_2012_2183_MOESM1_ESM.pdf/9530222)
Supplement: MOESM1 [file 9530222]

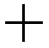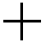

# Questionnaire to physicians about their sickness-certification practices

Karolinska Institutet, 2008

Contact:

Kristina Alexanderson  
Professor, Head of section  
Division of Insurance Medicine  
Karolinska Institutet  
SE-171 77 Stockholm  
Sweden

Tel: + 46 8 524 832 00  
Fax: + 46 8 524 832 05  
Mobile: + 46 702 162 099  
E-mail: [kristina.alexanderson@ki.se](mailto:kristina.alexanderson@ki.se)

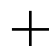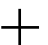

+

+

**1. What is your highest level of medical education?**

- Medical degree ⇒ *Go to question 3*
- Registered physician
- In resident training to become a specialist
- Board certified specialist

**2. What specialist training are you currently undergoing?**

- None**
- General practice
- Anaesthesia and intensive care
- Child and adolescent (medicine, surgery, or psychiatry)
- Imaging and functional medicine
- Occupational health
- Geriatrics
- Dermatology and sexually transmitted diseases
- Infectious diseases
- Internal medicine
- Surgery
- Laboratory medicine
- Neurology
- Obstetrics/Gynaecology
- Oncology
- Orthopaedics
- Psychiatry/Addiction medicine
- Rehabilitation medicine
- Rheumatology
- Ophthalmic diseases
- Ear, nose, and throat disorders
- Other

**3. How long have you worked at your current place of work?**

- < 5 years
- 5–9 years
- 10 years or more

+

+

+

+

**4. At what type of clinic/practice do you mainly work?***Choose only one of the following options.*

- Child and adolescent (medicine, surgery, or psychiatry)  
 Occupational health  
 Social insurance office/Insurance company  
 Geriatrics  
 Dermatology  
 Infectious diseases  
 Internal medicine  
 Surgery  
 Neurology  
 Gynaecology/Obstetrics  
 Oncology  
 Orthopaedics  
 Psychiatry  
 Rehabilitation  
 Rheumatology  
 Pain management  
 Primary Health Care Centre/Family medicine  
 Ophthalmology  
 Ear, nose, and throat  
 Other type of clinic/practice
- Administration, research, or teaching  
 None

**5. In what county or region is your primary place of employment?**

- |                                    |                                     |                                       |                                          |
|------------------------------------|-------------------------------------|---------------------------------------|------------------------------------------|
| <input type="checkbox"/> Blekinge  | <input type="checkbox"/> Jönköping  | <input type="checkbox"/> Stockholm    | <input type="checkbox"/> Västernorrland  |
| <input type="checkbox"/> Dalarna   | <input type="checkbox"/> Kalmar     | <input type="checkbox"/> Sörmland     | <input type="checkbox"/> Västmanland     |
| <input type="checkbox"/> Gotland   | <input type="checkbox"/> Kronoberg  | <input type="checkbox"/> Uppsala      | <input type="checkbox"/> Västra Götaland |
| <input type="checkbox"/> Gävleborg | <input type="checkbox"/> Norrbotten | <input type="checkbox"/> Värmland     | <input type="checkbox"/> Örebro          |
| <input type="checkbox"/> Halland   | <input type="checkbox"/> Skåne      | <input type="checkbox"/> Västerbotten | <input type="checkbox"/> Östergötland    |
| <input type="checkbox"/> Jämtland  |                                     |                                       |                                          |
- Other country

**6. Does your clinical unit have a joint policy for handling matters related to sickness certification tasks?**

- Yes, and it is well established  
 Yes, but it is not well established  
 No  
 I don't know
- Not applicable, I don't work in a clinical unit

+

+

+

+

7. **In your opinion, does the county council make efforts to improve the way that the health services handle patients' sickness certification?**

Yes, definitely

Yes, to some extent

No, not at all

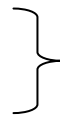

The effort is sufficient  Yes  No

8. **How often in your daily clinical work do you have consultations including consideration of sickness certification?**

More than 20  
times a week

6–20 times a  
week

1–5 times a  
week

About once a  
month

A few times a  
year

Never or almost  
never

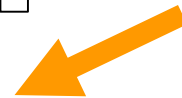

*If you chose the response “Never or almost never”, this was your final question.  
Thank you for your participation!*

9. **Is inpatient care part of your daily work?**

Yes

No

10. **What professional groups/expertise do you have access to in your daily work with patients?**

Occupational therapists

Psychologists

Cognitive behavioural therapists

Social workers

Physiotherapists

Other type of psychotherapist

Physicians

Nurses, midwives

Chiropractors, naprapaths, qualified  
orthopaedic manual therapists

Other category

11. **When handling sickness certification tasks, how often do you lack time...**

Every  
day

About  
once a  
week

About  
once a  
month

A few  
times a  
year

Never  
or  
almost  
never

...with your patients?






...to manage patient-related aspects (e.g., issue certificates, contact stakeholders, documentation, and meetings)?






...for further education, supervision, or reflection?






+

+

| 12. How often in your clinical work do...                                                                                                         | More<br>than 10<br>times a<br>week | 6–10<br>times<br>a week  | 1–5<br>times<br>a week   | About<br>once a<br>month | A few<br>times<br>a year | Never<br>or<br>almost<br>never |
|---------------------------------------------------------------------------------------------------------------------------------------------------|------------------------------------|--------------------------|--------------------------|--------------------------|--------------------------|--------------------------------|
| ...you find it problematic to handle sickness certification?                                                                                      | <input type="checkbox"/>           | <input type="checkbox"/> | <input type="checkbox"/> | <input type="checkbox"/> | <input type="checkbox"/> | <input type="checkbox"/>       |
| ...you encounter a patient who wants to be on sick leave for some reason other than work incapacity due to disease or injury?                     | <input type="checkbox"/>           | <input type="checkbox"/> | <input type="checkbox"/> | <input type="checkbox"/> | <input type="checkbox"/> | <input type="checkbox"/>       |
| ...patients partly or completely say no to sick leave you suggest?                                                                                | <input type="checkbox"/>           | <input type="checkbox"/> | <input type="checkbox"/> | <input type="checkbox"/> | <input type="checkbox"/> | <input type="checkbox"/>       |
| ...you say no to a patient who wants a sickness certificate?                                                                                      | <input type="checkbox"/>           | <input type="checkbox"/> | <input type="checkbox"/> | <input type="checkbox"/> | <input type="checkbox"/> | <input type="checkbox"/>       |
| ...you refer/send patients to occupational health services?                                                                                       | <input type="checkbox"/>           | <input type="checkbox"/> | <input type="checkbox"/> | <input type="checkbox"/> | <input type="checkbox"/> | <input type="checkbox"/>       |
| ...you issue a sickness certificate so that a patient will be eligible for higher benefit than unemployment or welfare benefits?                  | <input type="checkbox"/>           | <input type="checkbox"/> | <input type="checkbox"/> | <input type="checkbox"/> | <input type="checkbox"/> | <input type="checkbox"/>       |
| ...you experience conflicts with patients about sickness certification?                                                                           | <input type="checkbox"/>           | <input type="checkbox"/> | <input type="checkbox"/> | <input type="checkbox"/> | <input type="checkbox"/> | <input type="checkbox"/>       |
| ...you worry that a patient will report you, to e.g. a disciplinary board, regarding sickness certification?                                      | <input type="checkbox"/>           | <input type="checkbox"/> | <input type="checkbox"/> | <input type="checkbox"/> | <input type="checkbox"/> | <input type="checkbox"/>       |
| ...you feel threatened by a patient in connection with sickness certification?                                                                    | <input type="checkbox"/>           | <input type="checkbox"/> | <input type="checkbox"/> | <input type="checkbox"/> | <input type="checkbox"/> | <input type="checkbox"/>       |
| ...you issue sickness certificates to patients without seeing them (e.g., by telephone)?                                                          | <input type="checkbox"/>           | <input type="checkbox"/> | <input type="checkbox"/> | <input type="checkbox"/> | <input type="checkbox"/> | <input type="checkbox"/>       |
| ...you worry that patients will go to another physician if you don't issue a sickness certificate?                                                | <input type="checkbox"/>           | <input type="checkbox"/> | <input type="checkbox"/> | <input type="checkbox"/> | <input type="checkbox"/> | <input type="checkbox"/>       |
| ...patients say that they will change physician if you don't issue a sickness certificate?                                                        | <input type="checkbox"/>           | <input type="checkbox"/> | <input type="checkbox"/> | <input type="checkbox"/> | <input type="checkbox"/> | <input type="checkbox"/>       |
| ...you apply the newly introduced national sickness certification guidelines?                                                                     | <input type="checkbox"/>           | <input type="checkbox"/> | <input type="checkbox"/> | <input type="checkbox"/> | <input type="checkbox"/> | <input type="checkbox"/>       |
| ...you have time scheduled, alone or with colleagues, for supervision/feedback/reflection regarding sickness certification issues?                | <input type="checkbox"/>           | <input type="checkbox"/> | <input type="checkbox"/> | <input type="checkbox"/> | <input type="checkbox"/> | <input type="checkbox"/>       |
| ...you or your health care team participate in coordination meetings with social insurance and/or employer regarding sickness certified patients? | <input type="checkbox"/>           | <input type="checkbox"/> | <input type="checkbox"/> | <input type="checkbox"/> | <input type="checkbox"/> | <input type="checkbox"/>       |
| ...you or your care team have contact with employers in ways other than via the coordination meetings?                                            | <input type="checkbox"/>           | <input type="checkbox"/> | <input type="checkbox"/> | <input type="checkbox"/> | <input type="checkbox"/> | <input type="checkbox"/>       |
| ...you collaborate with or refer patients to social workers and/or psychologists in sickness-certification cases?                                 | <input type="checkbox"/>           | <input type="checkbox"/> | <input type="checkbox"/> | <input type="checkbox"/> | <input type="checkbox"/> | <input type="checkbox"/>       |

+

+

| <b>How often in your clinical work do...</b>                                                                      | More than 10 times a week | 6–10 times a week        | 1–5 times a week         | About once a month       | A few times a year       | Never or almost never    |
|-------------------------------------------------------------------------------------------------------------------|---------------------------|--------------------------|--------------------------|--------------------------|--------------------------|--------------------------|
| ...you collaborate with or refer patients to physical or occupational therapists in sickness-certification cases? | <input type="checkbox"/>  | <input type="checkbox"/> | <input type="checkbox"/> | <input type="checkbox"/> | <input type="checkbox"/> | <input type="checkbox"/> |
| ...you confer with other physicians when handling cases involving sickness certification?                         | <input type="checkbox"/>  | <input type="checkbox"/> | <input type="checkbox"/> | <input type="checkbox"/> | <input type="checkbox"/> | <input type="checkbox"/> |
| ...you have contact with social services regarding sickness-certification cases?                                  | <input type="checkbox"/>  | <input type="checkbox"/> | <input type="checkbox"/> | <input type="checkbox"/> | <input type="checkbox"/> | <input type="checkbox"/> |
| ...you have contact with the employment offices regarding sickness-certification cases?                           | <input type="checkbox"/>  | <input type="checkbox"/> | <input type="checkbox"/> | <input type="checkbox"/> | <input type="checkbox"/> | <input type="checkbox"/> |
| ...you lack for someone (e.g., a coach or case manager) who coordinates measures for the patients?                | <input type="checkbox"/>  | <input type="checkbox"/> | <input type="checkbox"/> | <input type="checkbox"/> | <input type="checkbox"/> | <input type="checkbox"/> |

| <b>13. How often do you certify unnecessarily long sick-leave periods due to ...</b>                  | Every day                | About once a week        | About once a month       | A few times a year       | Never or almost never    |
|-------------------------------------------------------------------------------------------------------|--------------------------|--------------------------|--------------------------|--------------------------|--------------------------|
| ...lack of next visit times?                                                                          | <input type="checkbox"/> | <input type="checkbox"/> | <input type="checkbox"/> | <input type="checkbox"/> | <input type="checkbox"/> |
| ...waiting times for investigation by health care services?                                           | <input type="checkbox"/> | <input type="checkbox"/> | <input type="checkbox"/> | <input type="checkbox"/> | <input type="checkbox"/> |
| ...waiting for investigation by the social insurance office (SIO)?                                    | <input type="checkbox"/> | <input type="checkbox"/> | <input type="checkbox"/> | <input type="checkbox"/> | <input type="checkbox"/> |
| ...waiting for investigation by the unemployment office?                                              | <input type="checkbox"/> | <input type="checkbox"/> | <input type="checkbox"/> | <input type="checkbox"/> | <input type="checkbox"/> |
| ...waiting for measures taken by an employer?                                                         | <input type="checkbox"/> | <input type="checkbox"/> | <input type="checkbox"/> | <input type="checkbox"/> | <input type="checkbox"/> |
| ...waiting times for treatment?                                                                       | <input type="checkbox"/> | <input type="checkbox"/> | <input type="checkbox"/> | <input type="checkbox"/> | <input type="checkbox"/> |
| ...lack of access to cognitive behavioural therapy?                                                   | <input type="checkbox"/> | <input type="checkbox"/> | <input type="checkbox"/> | <input type="checkbox"/> | <input type="checkbox"/> |
| ...lack of other adequate treatment and/or care provider? ( <i>Comments can be given on page 12</i> ) | <input type="checkbox"/> | <input type="checkbox"/> | <input type="checkbox"/> | <input type="checkbox"/> | <input type="checkbox"/> |
| ...that the patient does not follow recommendations for treatment and rehabilitation?                 | <input type="checkbox"/> | <input type="checkbox"/> | <input type="checkbox"/> | <input type="checkbox"/> | <input type="checkbox"/> |
| ...you want to avoid conflicts with the patient?                                                      | <input type="checkbox"/> | <input type="checkbox"/> | <input type="checkbox"/> | <input type="checkbox"/> | <input type="checkbox"/> |
| ...it takes too long to explain the alternatives to being on sick leave?                              | <input type="checkbox"/> | <input type="checkbox"/> | <input type="checkbox"/> | <input type="checkbox"/> | <input type="checkbox"/> |
| ...the influence of other members of your healthcare team?                                            | <input type="checkbox"/> | <input type="checkbox"/> | <input type="checkbox"/> | <input type="checkbox"/> | <input type="checkbox"/> |

+

+

+

+

**14. How problematic do you generally find it to...**

|                                                                                                                                                                      | Very                                                       | Fairly                   | Some-<br>what            | Not at<br>all            |
|----------------------------------------------------------------------------------------------------------------------------------------------------------------------|------------------------------------------------------------|--------------------------|--------------------------|--------------------------|
| ...handle sickness certification of patients?                                                                                                                        | <input type="checkbox"/>                                   | <input type="checkbox"/> | <input type="checkbox"/> | <input type="checkbox"/> |
| ...assess whether a patient's functioning is reduced?                                                                                                                | <input type="checkbox"/>                                   | <input type="checkbox"/> | <input type="checkbox"/> | <input type="checkbox"/> |
| ...assess whether the reduced functioning is due to disease or injury?                                                                                               | <input type="checkbox"/>                                   | <input type="checkbox"/> | <input type="checkbox"/> | <input type="checkbox"/> |
| ...assess the degree to which the reduced functioning limits a patient's work capacity?                                                                              | <input type="checkbox"/>                                   | <input type="checkbox"/> | <input type="checkbox"/> | <input type="checkbox"/> |
| ...discuss with the patient the advantages and disadvantages of being on sick leave?                                                                                 | <input type="checkbox"/>                                   | <input type="checkbox"/> | <input type="checkbox"/> | <input type="checkbox"/> |
| ...suggest a plan of action and/or measures to be taken during the sick leave?                                                                                       | <input type="checkbox"/>                                   | <input type="checkbox"/> | <input type="checkbox"/> | <input type="checkbox"/> |
| ...provide a long-term prognosis about the future work capacity of patients on sick leave?                                                                           | <input type="checkbox"/>                                   | <input type="checkbox"/> | <input type="checkbox"/> | <input type="checkbox"/> |
| ...manage the two roles as the patient's treating physician and as a medical expert for the social insurance office and other authorities?                           | <input type="checkbox"/>                                   | <input type="checkbox"/> | <input type="checkbox"/> | <input type="checkbox"/> |
| ...discuss possible lifestyle and life situation changes with a patient that you sickness certify?                                                                   | <input type="checkbox"/>                                   | <input type="checkbox"/> | <input type="checkbox"/> | <input type="checkbox"/> |
| ...discuss and know how to deal with other psychosocial problems (e.g., economic difficulties or physical or substance abuse) when handling a patient on sick leave? | <input type="checkbox"/>                                   | <input type="checkbox"/> | <input type="checkbox"/> | <input type="checkbox"/> |
| ...know what aspects of the sickness-certification process to be documented in the patient's medical file?                                                           | <input type="checkbox"/>                                   | <input type="checkbox"/> | <input type="checkbox"/> | <input type="checkbox"/> |
| ...handle prolongation of a sick-leave period initially certified by another physician?                                                                              | <input type="checkbox"/>                                   | <input type="checkbox"/> | <input type="checkbox"/> | <input type="checkbox"/> |
| ...assess the optimum duration and degree (part or full time) of sickness absence?                                                                                   | <input type="checkbox"/>                                   | <input type="checkbox"/> | <input type="checkbox"/> | <input type="checkbox"/> |
| ...handle situations in which you and a patient have different opinions about the need for sick leave?                                                               | <input type="checkbox"/>                                   | <input type="checkbox"/> | <input type="checkbox"/> | <input type="checkbox"/> |
| ...write sickness certificates for the Social Insurance Office?                                                                                                      | <input type="checkbox"/>                                   | <input type="checkbox"/> | <input type="checkbox"/> | <input type="checkbox"/> |
| ...write other certificates for the Social Insurance Office?                                                                                                         | <input type="checkbox"/>                                   | <input type="checkbox"/> | <input type="checkbox"/> | <input type="checkbox"/> |
| ...adhere to the national overarching sickness certification guidelines?                                                                                             | Have not used those guidelines<br><input type="checkbox"/> | <input type="checkbox"/> | <input type="checkbox"/> | <input type="checkbox"/> |
| ...issue sickness certificates in accordance with the national diagnosis-specific sickness certification guidelines?                                                 | Have not used those guidelines<br><input type="checkbox"/> | <input type="checkbox"/> | <input type="checkbox"/> | <input type="checkbox"/> |
| ...handle situations in which you and other members of the health care team have different opinions about sickness certifying a patient?                             | Not applicable<br><input type="checkbox"/>                 | <input type="checkbox"/> | <input type="checkbox"/> | <input type="checkbox"/> |

+

+

+

+

**15. In general, how satisfied are you regarding your contacts with the social insurance office (SIO)?**

- Very satisfied
- Somewhat satisfied
- Somewhat dissatisfied
- Very dissatisfied
- Have no contacts with the SIO

**How often do you usually have contact with SIO staff concerning sickness certification cases?**

*Do not include writing sickness certificates*

- Daily
- Once or a few times a week
- About once a month
- A few times a year
- Never or almost never

**Do you have regular, scheduled contacts with the SIO? (e.g., coordinating meetings, rehabilitation meetings, or SIO officers at your practice)**

- Yes, to a satisfactory degree
- Yes, but you would prefer more extensive contact
- No, but you would like to
- No, not needed

**How easy/difficult do you find it is to get in touch with SIO case officers?**

- Not relevant
- Very easy
- Fairly easy
- Neither easy nor difficult
- Fairly difficult
- Very difficult

+

+



+

+

**16. What difficulties, if any, do you experience in your contacts with the Social Insurance Office (SIO)?**

*Choose one or more options.*

- no such difficulties
- It takes too much time
- It's difficult to find out who to talk to
- It's difficult to get through by phone
- The SIO is closed when you have time for contact
- The SIO staff do not contact you, even if you ask them to
- The SIO doesn't coordinate rehabilitation measures
- The SIO doesn't contact the patients
- You encounter a negative attitude from SIO
- You seem to speak different languages
- Ambiguities concerning matters of confidentiality
- Patients are often assigned new SIO case officers (lack of continuity)
- SIO case officers question you/your assessments
- SIO medical officers question you/your assessments
- It's difficult to convey information through the pre-printed SIO forms for medical certificates
- Different interpretations of the new national sickness certification guidelines
- The patient is negative towards you contacting the SIO
- Other problems (*Please give comments on p. 12*)

**17. Considering your future contacts with the SIO, how important are the following options?**

You will not be in contact with the SIO  ⇒ *Go to question 18*

|                                                                                                          | Very important           | Fairly important         | Not important at all     |
|----------------------------------------------------------------------------------------------------------|--------------------------|--------------------------|--------------------------|
| More coordinating meetings (e.g., with the SIO, the employer, or the employment office, and the patient) | <input type="checkbox"/> | <input type="checkbox"/> | <input type="checkbox"/> |
| Fewer coordinating meetings                                                                              | <input type="checkbox"/> | <input type="checkbox"/> | <input type="checkbox"/> |
| General dialogue about sickness certification and insurance medicine                                     | <input type="checkbox"/> | <input type="checkbox"/> | <input type="checkbox"/> |
| Regular, scheduled meetings at the SIO to discuss patients                                               | <input type="checkbox"/> | <input type="checkbox"/> | <input type="checkbox"/> |
| Regular, scheduled meetings at your practice                                                             | <input type="checkbox"/> | <input type="checkbox"/> | <input type="checkbox"/> |
| Contact by e-mail and/or the Internet (possibly encrypted)                                               | <input type="checkbox"/> | <input type="checkbox"/> | <input type="checkbox"/> |
| Contact by ordinary mail                                                                                 | <input type="checkbox"/> | <input type="checkbox"/> | <input type="checkbox"/> |
| Contact by telephone                                                                                     | <input type="checkbox"/> | <input type="checkbox"/> | <input type="checkbox"/> |
| A contact person that you can quickly reach when necessary                                               | <input type="checkbox"/> | <input type="checkbox"/> | <input type="checkbox"/> |
| SIO case officers at your practice                                                                       | <input type="checkbox"/> | <input type="checkbox"/> | <input type="checkbox"/> |
| To be able to quickly obtain information from the SIO about the patient's previous sick leave            | <input type="checkbox"/> | <input type="checkbox"/> | <input type="checkbox"/> |
| To be able to meet a patient together with relevant SIO officer early in the handling of a case          | <input type="checkbox"/> | <input type="checkbox"/> | <input type="checkbox"/> |

+

+

+

+

To get information from the SIO about their handling and decisions regarding patients you have issued certificate for

**18. Do the new national sickness certification guidelines provided by the National Board of Health and Welfare facilitate your contacts with...**

|                                               | Yes                      | No                       |
|-----------------------------------------------|--------------------------|--------------------------|
| ... healthcare staff?                         | <input type="checkbox"/> | <input type="checkbox"/> |
| ... patient's workplace or employment office? | <input type="checkbox"/> | <input type="checkbox"/> |
| ... your patient?                             | <input type="checkbox"/> | <input type="checkbox"/> |
| ... the SIO?                                  | <input type="checkbox"/> | <input type="checkbox"/> |

I don't use the indicated guidelines

*Please, on page 12 give your views on whether and how the national sickness certification guidelines need to be further developed!*

**19. To what extent have the following helped you to develop your competence in handling sickness-certification cases?**

|                                                                                          | To a large extent        | To a fairly large extent | To some extent           | Not at all               | Not relevant             |
|------------------------------------------------------------------------------------------|--------------------------|--------------------------|--------------------------|--------------------------|--------------------------|
| Undergraduate studies                                                                    | <input type="checkbox"/> | <input type="checkbox"/> | <input type="checkbox"/> | <input type="checkbox"/> |                          |
| Internship                                                                               | <input type="checkbox"/> | <input type="checkbox"/> | <input type="checkbox"/> | <input type="checkbox"/> | <input type="checkbox"/> |
| Resident training                                                                        | <input type="checkbox"/> | <input type="checkbox"/> | <input type="checkbox"/> | <input type="checkbox"/> | <input type="checkbox"/> |
| Further training arranged by the county council                                          | <input type="checkbox"/> | <input type="checkbox"/> | <input type="checkbox"/> | <input type="checkbox"/> | <input type="checkbox"/> |
| Education/training opportunities other than those listed above                           | <input type="checkbox"/> | <input type="checkbox"/> | <input type="checkbox"/> | <input type="checkbox"/> | <input type="checkbox"/> |
| Your own searches for information (e.g., in the literature or the Internet)              | <input type="checkbox"/> | <input type="checkbox"/> | <input type="checkbox"/> | <input type="checkbox"/> |                          |
| Contacts with other physicians and/or other healthcare staff                             | <input type="checkbox"/> | <input type="checkbox"/> | <input type="checkbox"/> | <input type="checkbox"/> |                          |
| Contacts with patients                                                                   | <input type="checkbox"/> | <input type="checkbox"/> | <input type="checkbox"/> | <input type="checkbox"/> |                          |
| Contacts with Social Insurance Office staff                                              | <input type="checkbox"/> | <input type="checkbox"/> | <input type="checkbox"/> | <input type="checkbox"/> | <input type="checkbox"/> |
| Training arranged by the Social Insurance Office                                         | <input type="checkbox"/> | <input type="checkbox"/> | <input type="checkbox"/> | <input type="checkbox"/> | <input type="checkbox"/> |
| Contacts with employers                                                                  | <input type="checkbox"/> | <input type="checkbox"/> | <input type="checkbox"/> | <input type="checkbox"/> | <input type="checkbox"/> |
| Information via media                                                                    | <input type="checkbox"/> | <input type="checkbox"/> | <input type="checkbox"/> | <input type="checkbox"/> |                          |
| Targeted information efforts (e.g., made by a regional sickness certification committee) | <input type="checkbox"/> | <input type="checkbox"/> | <input type="checkbox"/> | <input type="checkbox"/> | <input type="checkbox"/> |
| Teaching and supervising others about these issues                                       | <input type="checkbox"/> | <input type="checkbox"/> | <input type="checkbox"/> | <input type="checkbox"/> | <input type="checkbox"/> |
| Conferences, seminars                                                                    | <input type="checkbox"/> | <input type="checkbox"/> | <input type="checkbox"/> | <input type="checkbox"/> | <input type="checkbox"/> |
| The newly introduced national sickness certification guidelines                          | <input type="checkbox"/> | <input type="checkbox"/> | <input type="checkbox"/> | <input type="checkbox"/> |                          |

+

+

+

+

+

+

+

+

| 20. To what extent do you need to further develop your competence in relation to the following?                                      | To a large extent        | To a fairly large extent | To some extent           | Not at all               |
|--------------------------------------------------------------------------------------------------------------------------------------|--------------------------|--------------------------|--------------------------|--------------------------|
| Assessing patients' functioning                                                                                                      | <input type="checkbox"/> | <input type="checkbox"/> | <input type="checkbox"/> | <input type="checkbox"/> |
| Assessing patients' work capacity                                                                                                    | <input type="checkbox"/> | <input type="checkbox"/> | <input type="checkbox"/> | <input type="checkbox"/> |
| The demands made on employees in different occupations and/or workplaces                                                             | <input type="checkbox"/> | <input type="checkbox"/> | <input type="checkbox"/> | <input type="checkbox"/> |
| Assessing the optimum length and degree of sickness absence                                                                          | <input type="checkbox"/> | <input type="checkbox"/> | <input type="checkbox"/> | <input type="checkbox"/> |
| Handling conflicts with patients about the need for sickness certification                                                           | <input type="checkbox"/> | <input type="checkbox"/> | <input type="checkbox"/> | <input type="checkbox"/> |
| Writing sickness certificates                                                                                                        | <input type="checkbox"/> | <input type="checkbox"/> | <input type="checkbox"/> | <input type="checkbox"/> |
| Designing optimum plans of action                                                                                                    | <input type="checkbox"/> | <input type="checkbox"/> | <input type="checkbox"/> | <input type="checkbox"/> |
| Deciding when there is a need to contact the Social Insurance Office                                                                 | <input type="checkbox"/> | <input type="checkbox"/> | <input type="checkbox"/> | <input type="checkbox"/> |
| Sickness insurance rules and laws                                                                                                    | <input type="checkbox"/> | <input type="checkbox"/> | <input type="checkbox"/> | <input type="checkbox"/> |
| Other types of compensation in the social insurance system (e.g., rehabilitation allowance, disablement benefit, disability pension) | <input type="checkbox"/> | <input type="checkbox"/> | <input type="checkbox"/> | <input type="checkbox"/> |
| Private and supplementary insurances that patients often have                                                                        | <input type="checkbox"/> | <input type="checkbox"/> | <input type="checkbox"/> | <input type="checkbox"/> |
| Your options and responsibilities as a physician in sickness certification cases                                                     | <input type="checkbox"/> | <input type="checkbox"/> | <input type="checkbox"/> | <input type="checkbox"/> |
| The options and responsibilities of the Social Insurance Office in sickness certification cases                                      | <input type="checkbox"/> | <input type="checkbox"/> | <input type="checkbox"/> | <input type="checkbox"/> |
| Employers' options and responsibilities in sickness certification cases                                                              | <input type="checkbox"/> | <input type="checkbox"/> | <input type="checkbox"/> | <input type="checkbox"/> |
| The options and responsibilities of the Employment Office in sickness certification cases                                            | <input type="checkbox"/> | <input type="checkbox"/> | <input type="checkbox"/> | <input type="checkbox"/> |
| Using the new national sickness certification guidelines                                                                             | <input type="checkbox"/> | <input type="checkbox"/> | <input type="checkbox"/> | <input type="checkbox"/> |
| Gender aspects of sickness certification                                                                                             | <input type="checkbox"/> | <input type="checkbox"/> | <input type="checkbox"/> | <input type="checkbox"/> |
| Other aspects of diversity that can be related to sickness certification                                                             | <input type="checkbox"/> | <input type="checkbox"/> | <input type="checkbox"/> | <input type="checkbox"/> |
| The various possibilities in society regarding handling psychosocial problems                                                        | <input type="checkbox"/> | <input type="checkbox"/> | <input type="checkbox"/> | <input type="checkbox"/> |

+

+

+

+

| <b>21. How do you value the following options with regard to ensuring high quality of your handling of sickness certification cases?</b> | Very beneficial          | Moderately beneficial    | Not beneficial           |
|------------------------------------------------------------------------------------------------------------------------------------------|--------------------------|--------------------------|--------------------------|
| Contacts with fellow physicians and/or other healthcare staff                                                                            | <input type="checkbox"/> | <input type="checkbox"/> | <input type="checkbox"/> |
| Contacts with patients' employers and visits to workplaces                                                                               | <input type="checkbox"/> | <input type="checkbox"/> | <input type="checkbox"/> |
| Supervision/being tutored                                                                                                                | <input type="checkbox"/> | <input type="checkbox"/> | <input type="checkbox"/> |
| Collaborative or coordinating meetings                                                                                                   | <input type="checkbox"/> | <input type="checkbox"/> | <input type="checkbox"/> |
| Contacts with medical officers at the Social Insurance Office                                                                            | <input type="checkbox"/> | <input type="checkbox"/> | <input type="checkbox"/> |
| Contacts with case officers at the Social Insurance Office                                                                               | <input type="checkbox"/> | <input type="checkbox"/> | <input type="checkbox"/> |
| The national diagnosis-specific sickness certification guidelines                                                                        | <input type="checkbox"/> | <input type="checkbox"/> | <input type="checkbox"/> |
| A joint instrument/protocol for assessment of work capacity                                                                              | <input type="checkbox"/> | <input type="checkbox"/> | <input type="checkbox"/> |
| Written information (e.g., books, brochures, articles)                                                                                   | <input type="checkbox"/> | <input type="checkbox"/> | <input type="checkbox"/> |
| Information from the Internet                                                                                                            | <input type="checkbox"/> | <input type="checkbox"/> | <input type="checkbox"/> |
| Courses in insurance medicine                                                                                                            | <input type="checkbox"/> | <input type="checkbox"/> | <input type="checkbox"/> |
| Courses in conflict management                                                                                                           | <input type="checkbox"/> | <input type="checkbox"/> | <input type="checkbox"/> |
| Conferences, seminars                                                                                                                    | <input type="checkbox"/> | <input type="checkbox"/> | <input type="checkbox"/> |
| Having opportunities to contact experts in insurance medicine                                                                            | <input type="checkbox"/> | <input type="checkbox"/> | <input type="checkbox"/> |
| Getting a second opinion from other physician regarding a patient                                                                        | <input type="checkbox"/> | <input type="checkbox"/> | <input type="checkbox"/> |
| Getting statistics on your issued sickness certificates over the past year                                                               | <input type="checkbox"/> | <input type="checkbox"/> | <input type="checkbox"/> |
| Getting statistics on issued sickness certificates at your unit/practice over the past year                                              | <input type="checkbox"/> | <input type="checkbox"/> | <input type="checkbox"/> |
| Better information to the general public about the sickness insurance system                                                             | <input type="checkbox"/> | <input type="checkbox"/> | <input type="checkbox"/> |
| Receiving higher remuneration for issuing sickness certificates                                                                          | <input type="checkbox"/> | <input type="checkbox"/> | <input type="checkbox"/> |
| A forum in which you can reflect on your work with sickness certification                                                                | <input type="checkbox"/> | <input type="checkbox"/> | <input type="checkbox"/> |

**22. Do sickness certification tasks constitute a work environment problem for you?**

- Yes, to a great extent  
 Yes, to some extent  
 No

**23. Do you have support from your immediate manager at your practice/clinic regarding sickness certification cases?**

- Yes, substantial support  
 Yes, some support  
 No  
 Not applicable, don't have a manager  
 Not applicable, don't work at a clinical unit

+

+

+

+

**Thank you very much for your participation!**

**Space for your own comments:**

+

+
